# Supplementary material
Source: PubMed Central journal article supplement (PMC2556438)
Supplement: mmc1.pdf [file mmc1.pdf]

**Supplemental Data**

**DYRK1A-Dosage Imbalance Perturbs NRSF/REST Levels,  
Deregulating Pluripotency and Embryonic Stem Cell Fate  
in Down Syndrome**

Claudia Canzonetta, Claire Mulligan, Samuel Deutsch, Sandra Ruf, Aideen O'Doherty, Robert Lyle, Christelle Borel, Nathalie Lin-Marq, Frederic Delom, Jürgen Groet, Felix Schnappauf, Serena De Vita, Sharon Averill, John V. Priestley, Joanne E Martin, Janet Shipley, Gareth Denyer, Charles J. Epstein, Cristina Fillat, Xavier Estivill, Victor L. J. Tybulewicz, Elizabeth M.C. Fisher, Stylianos E. Antonarakis, and Dean Nizetic

**Figure S1. Significantly Increased or Decreased Probe Sets**

(1) Numbers of probe sets from the total of 12488 on MGU74Av2 mouse expression microarrays (Affymetrix) found to be significantly increased (Inc.) or decreased (Dec.) in 47-1 compared to D3 RNA, using two different search strategies (MAS= search based on Affymetrix MicroArray Suite change calls; ANOVA = search based on Analysis Of Variance in Genespring; see Methods in paper for details). Green areas indicate numbers of genes found by both search strategies, and numbers in parentheses indicate how many genes are expected in the intersection by chance alone.

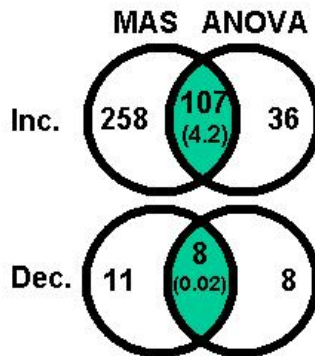

**Figure S2. qRT-PCR Analysis of Rest and Selected Rest Downstream Target Genes**

qRT-PCR analysis of Rest and selected Rest downstream target genes in tissues of adult Ts1Cje mice and their WT littermates (n = 6). Means and standard errors are shown.

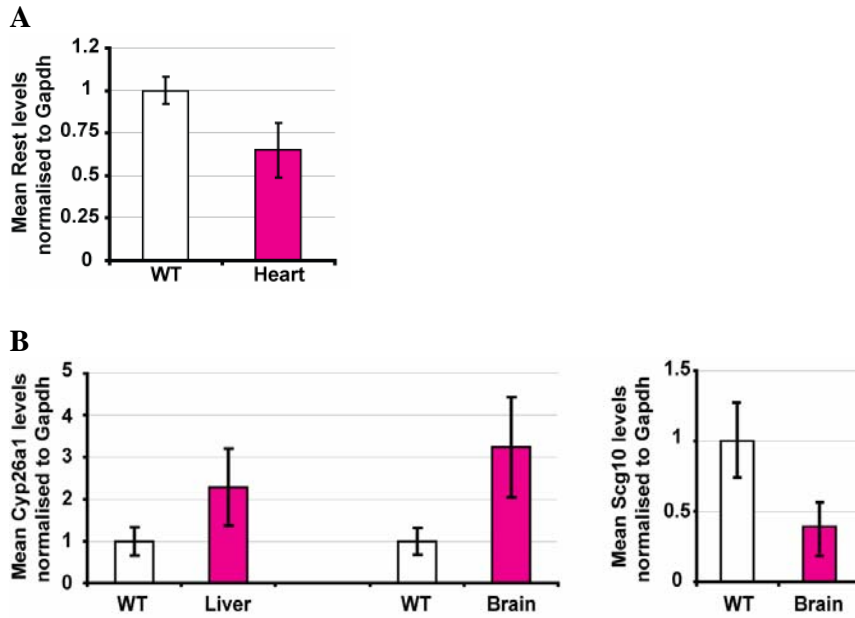

**Figure S3. Efficiency of Gene Silencing**

Verification of the efficiency of gene(s) silencing with specific RNAi in mouse E14ES cells (Figure 2C in the main text). Means and standard errors are shown.

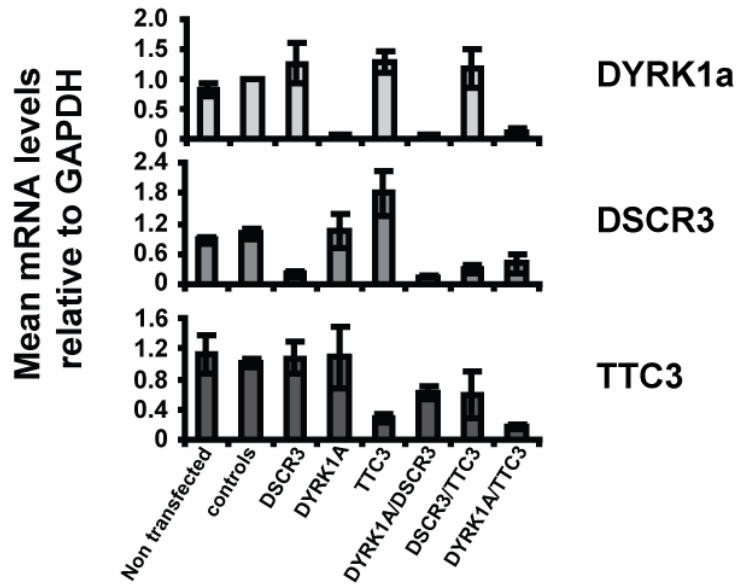

**Figure S4. qRT-PCR Analysis of Rest and Cbr1 and Rest and Setd4**

qRT-PCR analysis of Rest and Cbr1 (panel a) and of Rest and Setd4 (panel b) mRNA levels in undifferentiated mouse D3 ES cells transfected with RNAi targeting, respectively, Cbr1 and Setd4. Means and standard errors are shown.

**a**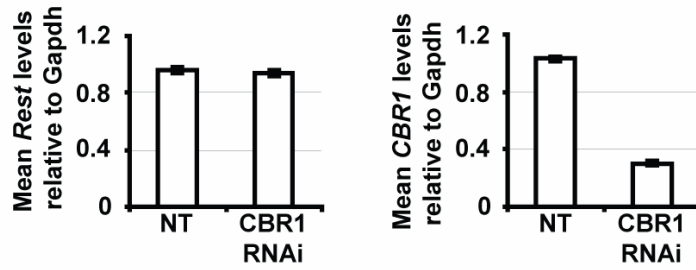**b**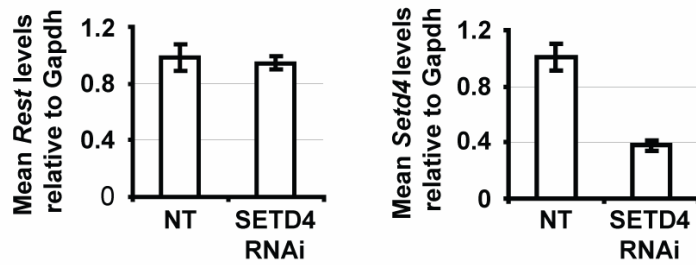

**Figure S5. Secondary versus Primary Neurites**

Mean numbers of secondary neurites per number of primary neurites are shown in D3/47-1 after three days of neuronal differentiation in N2 medium. Means and standard errors are shown (n = 3 independent experiments).

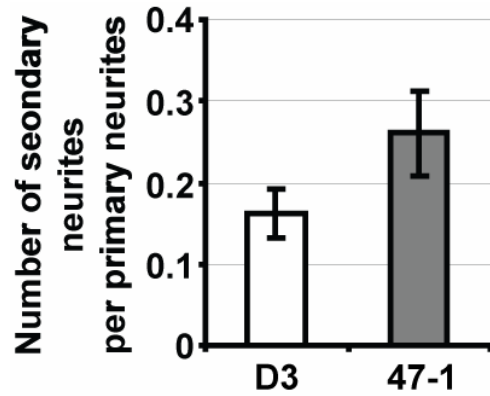

Table S3. Primers and Probes used for qRT-PCR

| Gene                | Oligonucleotide Sequences                                                                            | ABI Cat. Number |
|---------------------|------------------------------------------------------------------------------------------------------|-----------------|
| Mouse Rest 1 (SYBR) | ACTCATT CAGGTGAGAAGCC,<br>TGAACCTGTCTTGCATGTCC                                                       |                 |
| Mouse Rest 4 (SYBR) | GTGTGATCTAGCTGGGTATG<br>TGAACCTGTCTTGCATGTCC                                                         |                 |
| Gapdh (SYBR)        | TCACCACCATGGAGAAGCC,<br>GCTAAGCAGTTGGTGGTGCA                                                         |                 |
| Mouse Rest          | CAGGAAAGTCTACACCTGCA,<br>TTGAGTAAGGACAAAGTTCACA                                                      |                 |
| Taqman Gapdh        | -                                                                                                    | Mm99999915_g1   |
| Taqman Map2         | -                                                                                                    | Mm00485230_m1   |
| Taqman Nestin       |                                                                                                      | Mm00450205_m1   |
| Tubb3 (SYBR)        | GCTGTCCGCCTGCCTTTT,<br>GACCTCCCAGAACTTGGCC                                                           |                 |
| Human REST          | GACATATGCGTACTCATT CAGGTGA,<br>TGGCGGGT TACTTCATGTTG<br>PROBE:<br>TTAGAGGCCACATAACTGCACTGATCACATTTAA |                 |
| mDscr3 (SYBR)       | GAGATGCCACAGAGATTCAG<br>GTGGTCAGCATGAAGGAGG                                                          |                 |
| mTtc3 (SYBR)        | TCATTCCGGCTGCCTCTGTG<br>TTTCATGGCATAATCTCACAGG                                                       |                 |
| hmDyrk1a (SYBR)     | CCTCTGTT CAGTGGTGCC<br>CCGTTTTCCATCTTTGGTC                                                           |                 |
| mOct4 (SYBR)        | CACGAGTGGAAAGCAACTCA<br>TTCATGTCCTGGGACTCCTC                                                         |                 |
| mNanog (SYBR)       | CTTACGTACAGTTGCAGCAAAACT<br>GTGGAGTCACAGAGTAGTTCAGGA                                                 |                 |
| mGata4 (SYBR)       | TCGTATATATTTT GAGCGAGTTGG<br>ACTGTCACCAAAAATCAAAACAAA                                                |                 |
| mGata6 (SYBR)       | TCTGAGGTC ACTTGG AATTTGTAA<br>GCAAATGATTTAACACTGATTGCT                                               |                 |
| mFoxa2 (SYBR)       | C GACTGGAGCAGCTACTAC<br>GCGGACATGCTCATGTAGTG                                                         |                 |
| mPitx2 (SYBR)       | CGGCAGAGGACTCATTTCAC<br>CTTCCGTAAGGTTGGTCCAC                                                         |                 |
| mSnai1 (SYBR)       | ACTGGTGAGAAGCCATTCTCCT<br>CTGGTATCTTTCACATCCGAGT                                                     |                 |
| mSox2 (SYBR)        | GAGAGCAAGTACTGGCAAGACCG<br>ATATCAACCTGCATGGACATTTTT                                                  |                 |
| mSetd4 (SYBR)       | AACAGGAAGAGGGCTGATGA<br>GAGACACAGGAGGCTTCCAC                                                         |                 |
| mCbr1 (SYBR)        | ATCACTCGTGACCTGTGTCCG<br>CCTCCGTATTCCTTGAGCAG                                                        |                 |

Table S4. List of RNAi Oligos

| RNAi target                           | Oligonucleotide sequences           |
|---------------------------------------|-------------------------------------|
| Nonspecific control                   | UAAUGUAUUGGAACGCAUATT               |
| <i>Dyrk1Aa</i>                        | CUUUGAACCUAACACGAAA                 |
| <i>Dyrk1Ab</i>                        | GCCACUUUAUGUUUCGAAA                 |
| <i>Dyrk1Ac</i>                        | GGAACCCGUAACUUCUAU                  |
| <i>Dscr3a</i>                         | GGUCCUGUAUGAGACUUAUACTT             |
| <i>Dscr3b</i>                         | CCAGCAAGCUCUCUGAUUGTT               |
| <i>Ttc3a</i>                          | GCAGUGGAGUAUGUUAUCGTT               |
| <i>Ttc3b</i>                          | AGAAUGGAAGAGGACUUAATT               |
| Human-specific <i>DYRK1A</i> (3' UTR) | AAGUUGACUCCUUAUUGGTT                |
| <i>Setd4</i>                          | siGENOME SMARTpool L-052980-01-0005 |
| <i>Cbr1</i>                           | siGENOME SMARTpool M-044203-00-0005 |

Table S5. Mapping Data for ES Cell Lines

|        | 40-2 | 46-1 | 47-1 | D3 |
|--------|------|------|------|----|
| SETD4  | -    | -    | +    | -  |
| MORC3  | -    | -    | +    | -  |
| HLCS   | -    | -    | +    | -  |
| DSCR6  | -    | -    | +    | -  |
| DSCR5  | -    | -    | +    | -  |
| TTC3   | +    | -    | +    | -  |
| DYRK1A | +    | -    | +    | -  |
| KCNJ6  | +    | +    | +    | -  |
| D21S55 | +    | +    | +    | -  |
| KCNJ15 | -    | -    | +    | -  |

Mapping data for the transchromosomal ES cell lines using human-specific marker sequences for the genes/markers in column 1. The mapping is shown only for the critical region that is the most significant eQTL for the control of Rest in human LBL (see Figure 2a and 2b in the main paper). The mapping for the remainder of the HSA21 is based on (Hernandez et al. 1999; O'Doherty et al. 2005, Mensah et al. 2007) and unpublished data using additional markers.
